# Supplementary material for: Utilisation of in situ formed cyano-bridged coordination polymers as precursors of supported Ir–Ni alloy nanoparticles with precisely controlled compositions and sizes
Source: Royal Society of Chemistry journal article supplement (doi:10.1039/d4dt02386b), 2024-01-01
Supplement: d4dt02386b1.pdf [file d4dt02386b1.pdf]

## Electronic supplementary information (ESI)

### Utilisation of *in situ* formed cyano-bridged coordination polymers as precursors of supported Ir–Ni alloy nanoparticles with precisely controlled compositions and sizes

Yusuke Yamada,<sup>\*ab</sup> Miho Nishida,<sup>a</sup> Tatsuya Nakabayashi,<sup>a</sup> Takashi Nakazono,<sup>b</sup>  
Hanghao Lin,<sup>a</sup> Pengru Chen,<sup>a</sup> and Masazumi Tamura<sup>\*ab</sup>

<sup>a</sup>Department of Chemistry and Bioengineering, Graduate School of Engineering, Osaka Metropolitan University, Sugimoto, Sumiyoshi, Osaka, 558-8585, Japan.

<sup>b</sup>Research Center for Artificial Photosynthesis, Osaka Metropolitan University, Sumiyoshi, Osaka 558-8585, Japan.

\*E-mail: ymd@omu.ac.jp; mtamura@omu.ac.jp

a) Conventional method

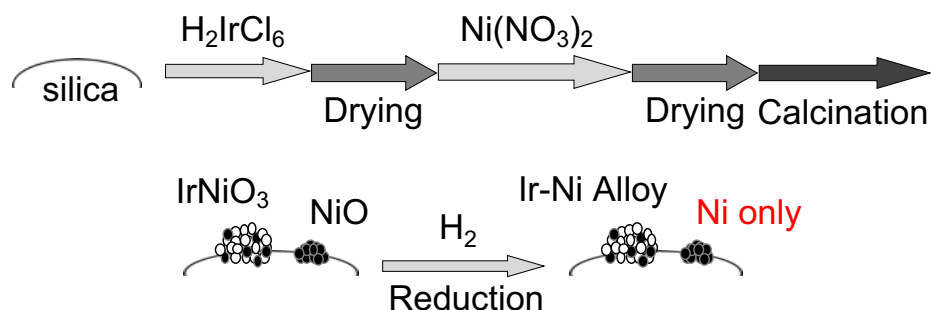

b) This work

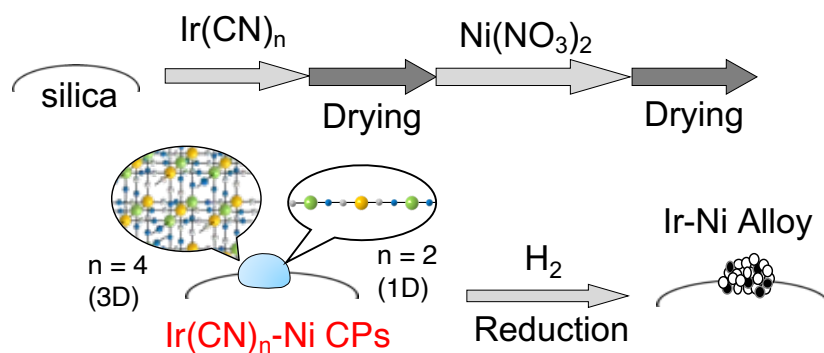

**Scheme S1.** Preparation methods of Ir-Ni alloys supported on  $\text{SiO}_2$  by using  $\text{Ni}(\text{NO}_3)_2$  and (a)  $\text{H}_2\text{IrCl}_6$  and (b)  $[\text{Ir}(\text{CN})_6]^{3-}$  ( **$\text{Ir}(\text{CN})_6$** ) or  $[\text{Ir}(\text{ppy})_2(\text{CN})_2]^-$  (ppy = 2-phenylpyridine;  **$\text{Ir}(\text{CN})_2$** ) as precursors. Formation of unalloyed Ni nanoparticles (Ni only) is hardly avoidable with  $\text{H}_2\text{IrCl}_6$ .

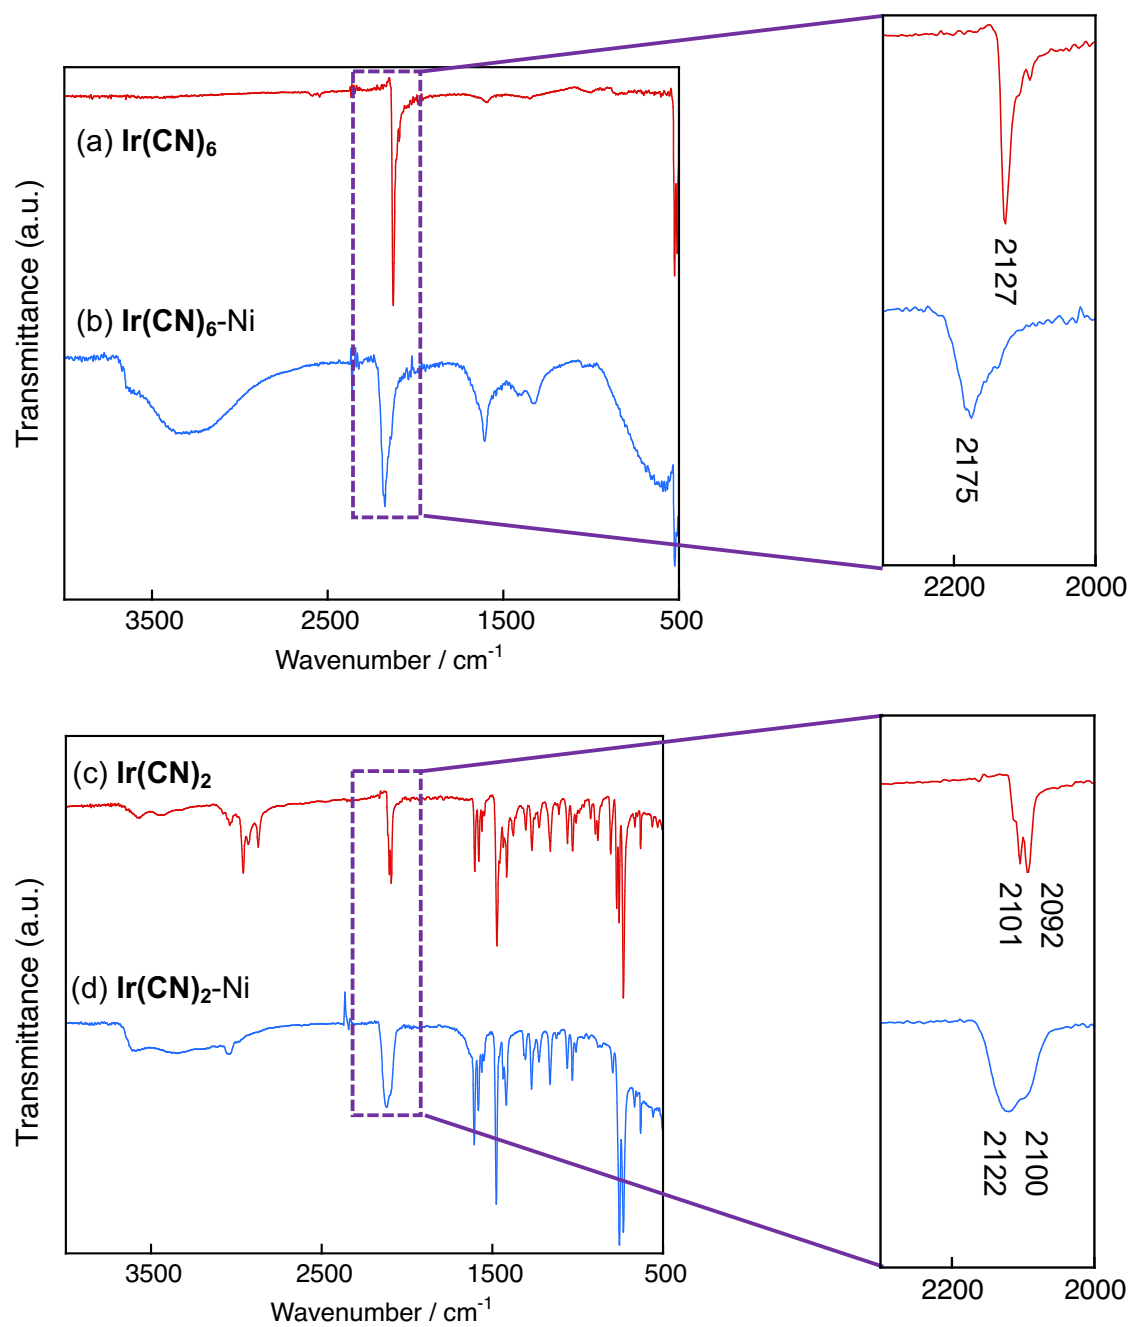

**Fig. S1.** IR spectra of (a)  $\text{K}_3[\text{Ir}(\text{CN})_6]$  ( $\text{Ir}(\text{CN})_6$ ), (b)  $\text{Ni}_{1.5}[\text{Ir}(\text{CN})_6]$  ( $\text{Ir}(\text{CN})_6\text{-Ni}$ ), (c)  $(n\text{-Bu}_4\text{N})[\text{Ir}(\text{ppy})_2(\text{CN})_2]$  ( $\text{Ir}(\text{CN})_2$ ) and (d)  $\text{Ni}_{0.5}[\text{Ir}(\text{ppy})_2(\text{CN})_2]$  ( $\text{Ir}(\text{CN})_2\text{-Ni}$ ).

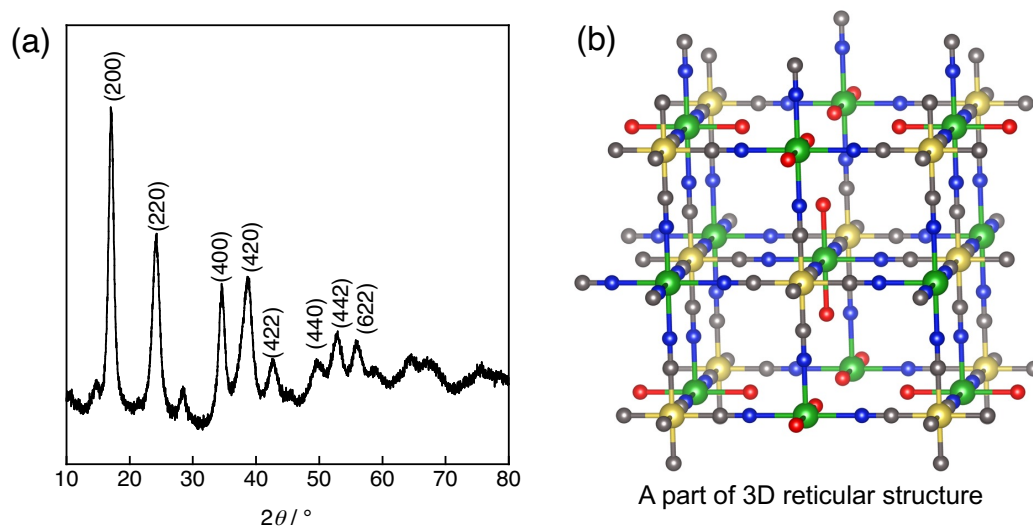

**Fig. S2.** (a) Powder X-ray diffraction pattern of  $\text{Ni}_{1.5}[\text{Ir}(\text{CN})_6]$  ( $\text{Ir}(\text{CN})_6\text{-Ni}$ ) and (b) a schematic drawing of the 3D reticular structure usually observed for Prussian blue analogues. The numbers in parenthesis are  $(hkl)$  indices.

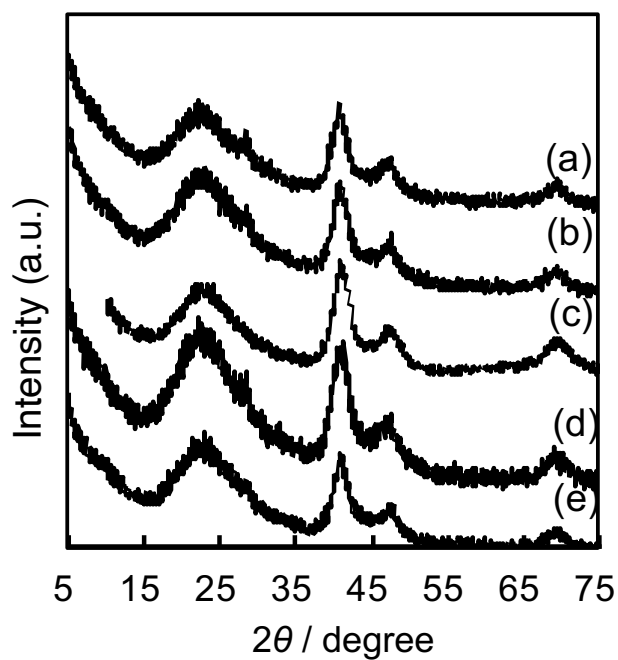

**Fig. S3.** Powder X-ray diffraction patterns of  $\text{Ir}(\text{CN})_6\text{-Ni}/\text{SiO}_2\text{-X}$  [ $X = \text{Ni}/(\text{Ni}+\text{Ir})$ ].  $X =$  (a) 0.05, (b) 0.10, (c) 0.15 (d) 0.20 and (e) 0.25 in wide range.

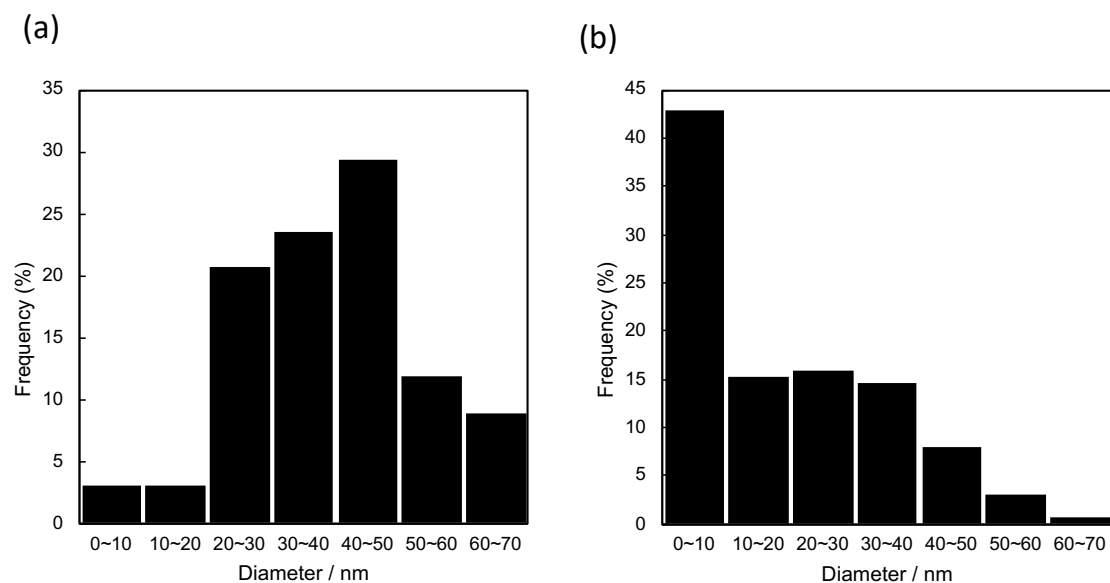

**Fig. S4.** Size distributions of supported particles in (a)  $\text{Ir(CN)}_6\text{-Ni/SiO}_2\text{-0.2}$  and (b)  $\text{Ir(CN)}_6\text{-Ni/SiO}_2\text{-0.4}$ .

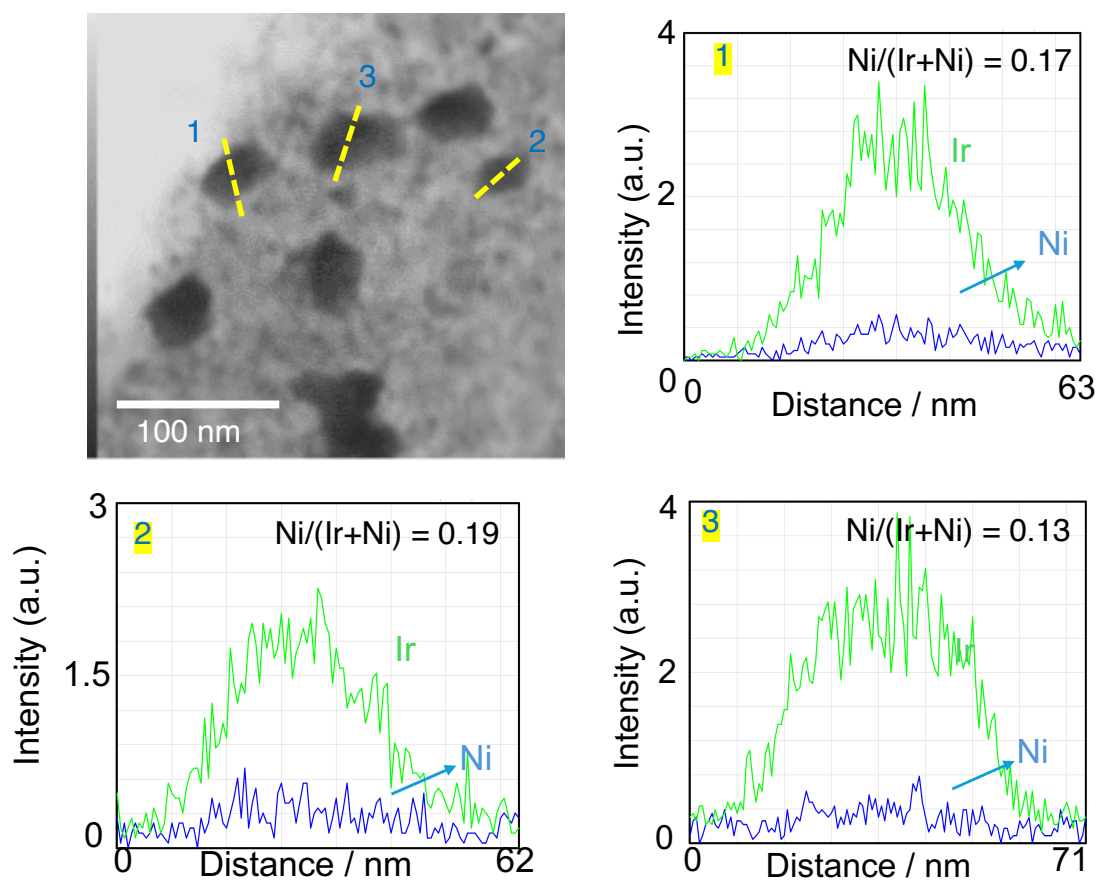

**Fig. S5.** EDX line scanning spectra of Ir and Ni of three single particles supported on  $\text{SiO}_2$  ( $\text{Ir(CN)}_6\text{-Ni/SiO}_2\text{-0.4}$ ).

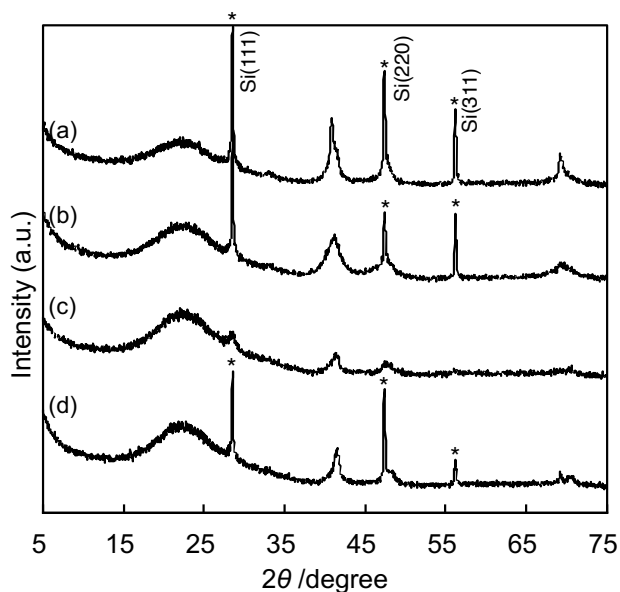

**Fig. S6.** PXRD patterns of (a)  $\text{Ir(CN)}_2\text{-Ni/SiO}_2\text{-0.10}$ , (b)  $\text{Ir(CN)}_2\text{-Ni/SiO}_2\text{-0.15}$ , (c)  $\text{Ir(CN)}_2\text{-Ni/SiO}_2\text{-0.20}$  and (d)  $\text{Ir(CN)}_2\text{-Ni/SiO}_2\text{-0.40}$ . The peaks with \* are ascribed to Si used as internal standard.

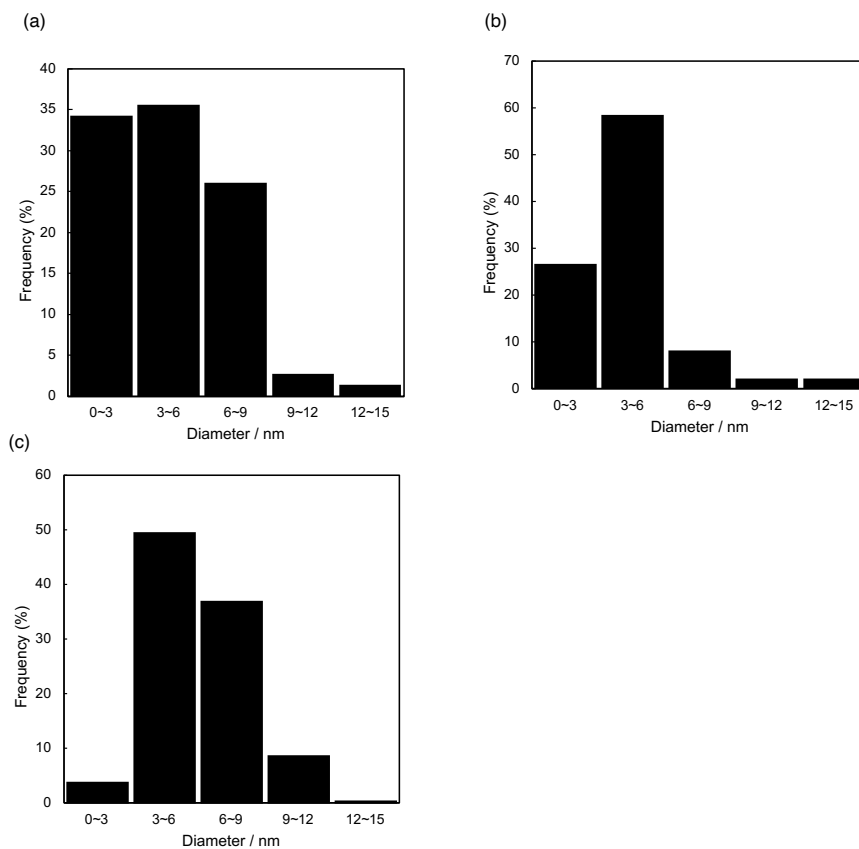

**Fig. S7.** Size distribution of supported particles of  $\text{Ir(CN)}_2\text{-Ni/SiO}_2\text{-X}$ . X = (a) 0.10, (b) 0.15 and (c) 0.40.

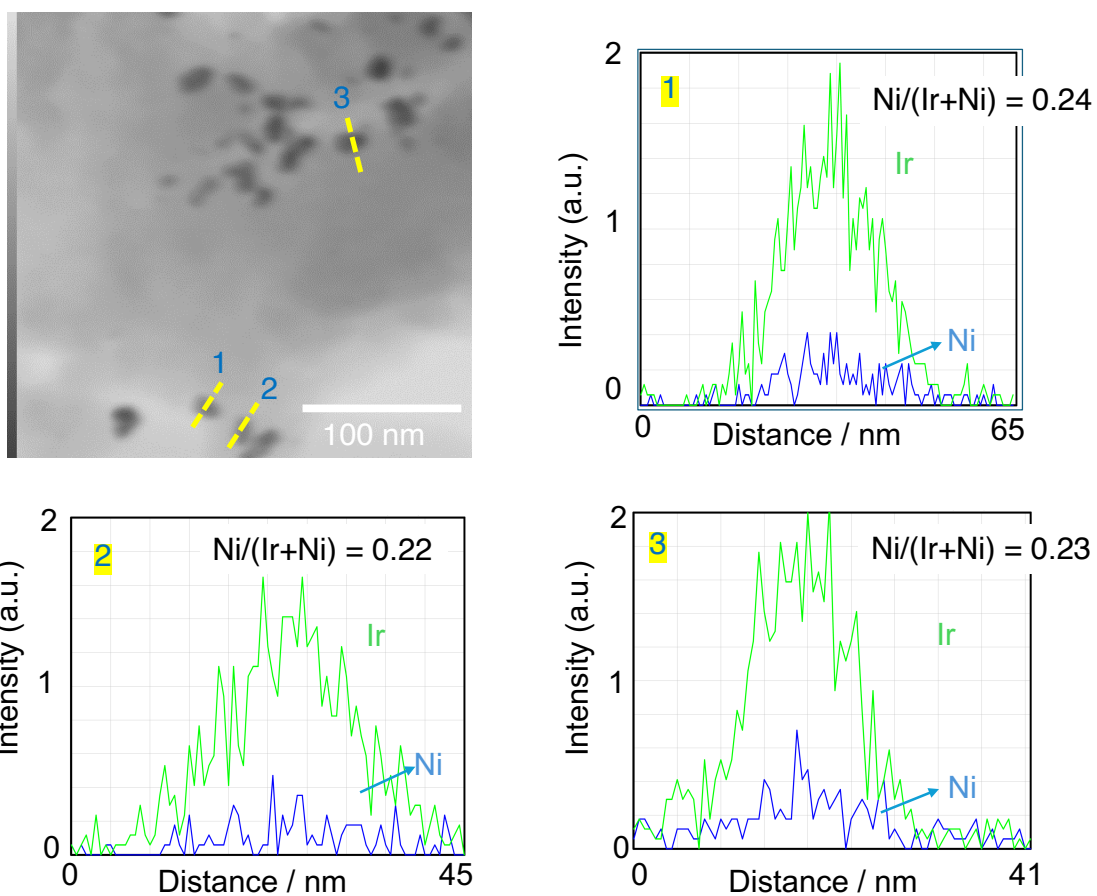

**Fig. S8.** EDX line scanning spectra of Ir and Ni of three single Ir-Ni particles supported on  $\text{SiO}_2$  ( $\text{Ir}(\text{CN})_2\text{-Ni/SiO}_2\text{-0.4}$ ).

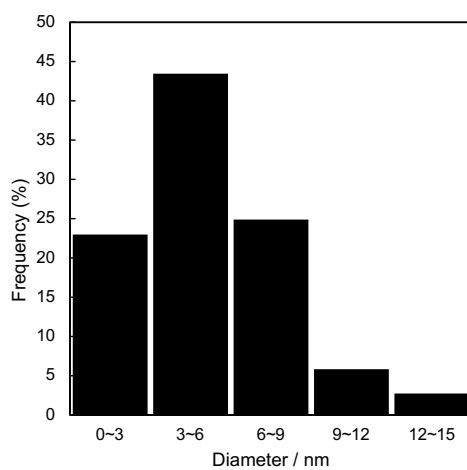

**Fig. S9.** Size distribution of supported particles of  $\text{Ir}(\text{CN})_2\text{-Ni/SiO}_2\text{-Al}_2\text{O}_3\text{-0.2}$ .
